# Supplementary material
Source: PubMed Central journal article supplement (PMC6168918)
Supplement: JCB715956_supplementary_material.pdf [file JCB715956_supplementary_material.pdf]

**Supplementary Figure 1:** NICD and p53 co-localize in the neuronal nucleus following ischemic stroke.

Immunofluorescent staining of NICD (red), P-p53 (green), and the nuclear marker 4'6-diamidino-2-phenylindol (DAPI) (blue) at the cortical penumbra region of the ipsilateral brain in mice. Both NICD and P-p53 staining showed an increase and neuronal co-localization after 1 h of ischemia and 24 h reperfusion (I/R) at the ipsilateral region. \*Core region. Scale bar: 20  $\mu$ m.
